# Supplementary material for: Morphology-dependent enhancement of template-guided tunable polyaniline nanostructures for the removal of Cr(vi)
Source: Royal Society of Chemistry journal article supplement (doi:10.1039/c5ra25630e), 2016-01-01
Supplement: c5ra25630e1.pdf [file c5ra25630e1.pdf]

**Morphology-dependent enhancement of the removal of Cr (VI) of template-guided tunable polyaniline nanostructures**

Yaxi Tian, Haizhen Li, Yan Liu, Guijia Cui, Zebin Sun, Shiqiang Yan\*

*College of Chemistry and Chemical Engineering, Lanzhou University, Lanzhou 730000, P. R.*

*China*

---

\* Corresponding author. Tel.: +86 931 8912582; Fax: +86 931 8912582

E-mail address: yansq@lzu.edu.cn

## 1. TEM images

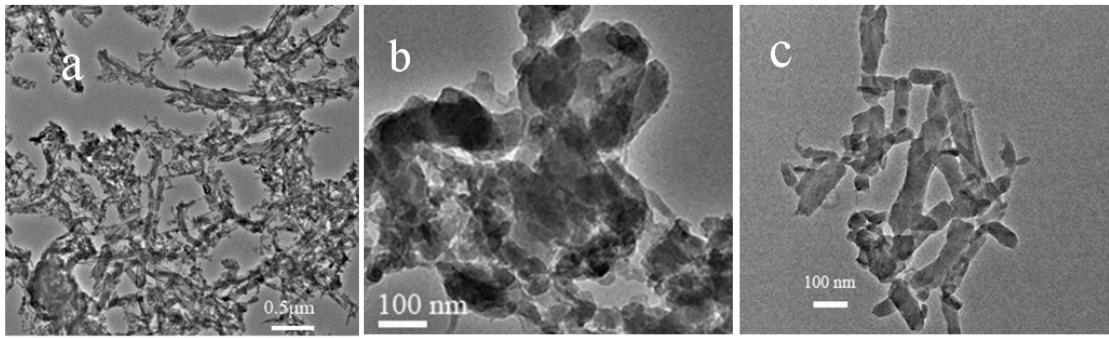

TEM images of (a) PANI nanotubes and (b) PANI nanosheets and (c) PANI nanofibers.

## 2.

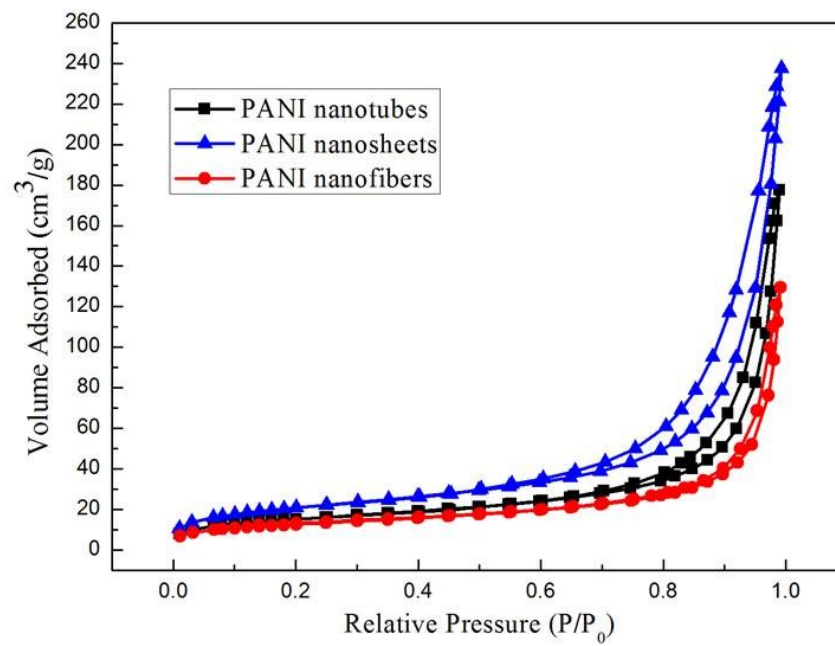

$\text{N}_2$  adsorption-desorption isotherms of three different morphologies of PANIs nanostructures.

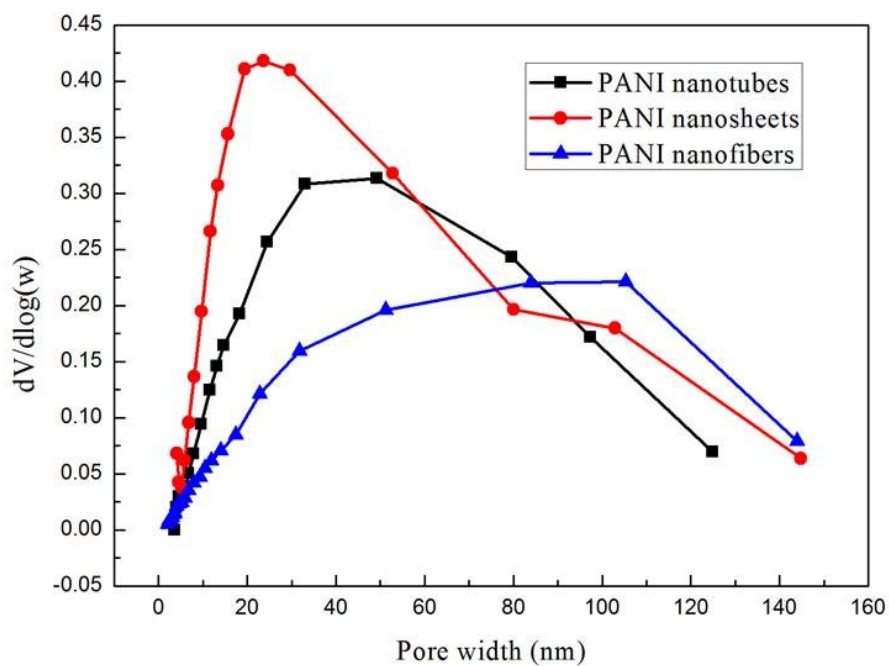

Pore size distributions of three different morphologies of PANIs nanostructures.

### 3. Adsorption capacities of different materials.

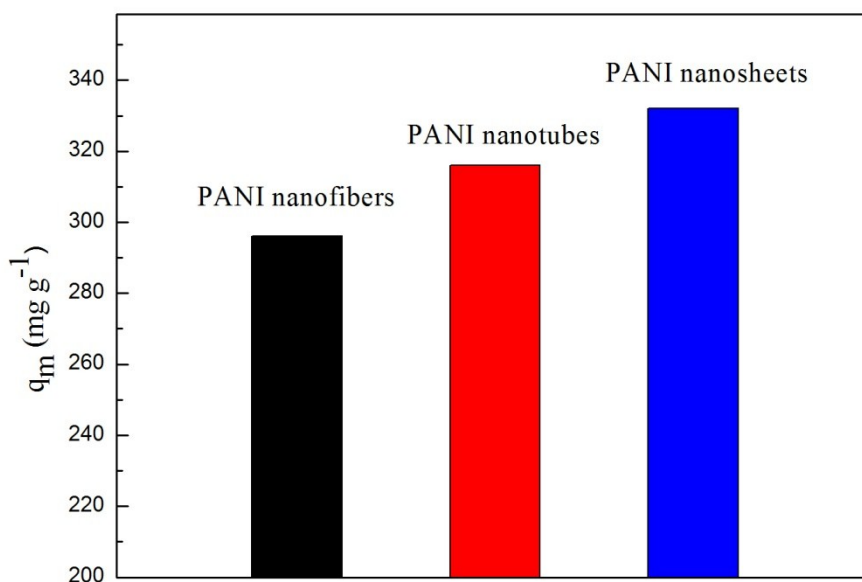

**Fig.S1** Adsorption capacities of different materials (experimental conditions: adsorbents dosage: 0.2 g L<sup>-1</sup>, concentration: 300 mg L<sup>-1</sup>, pH: 2, T: 298K) .

### 4. Adsorption kinetics

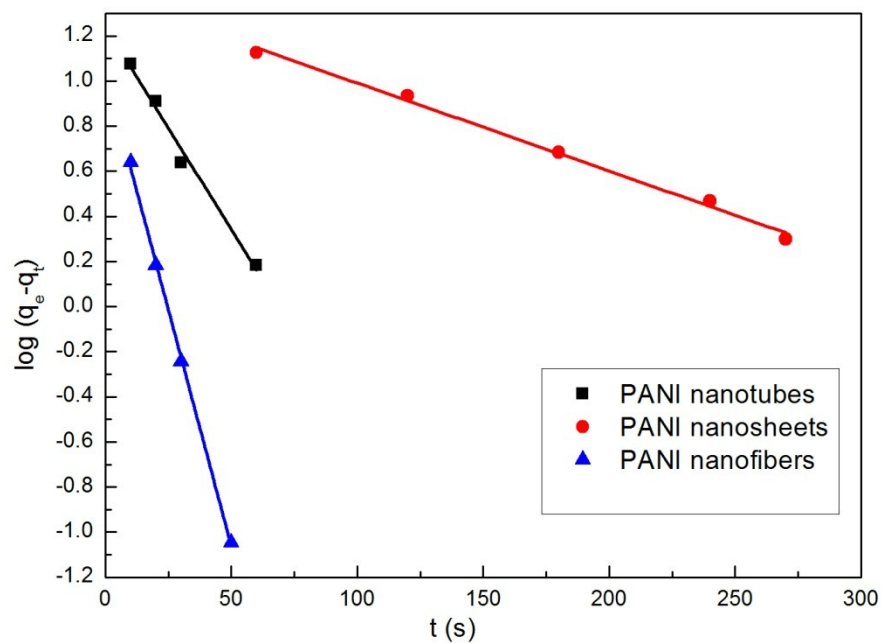

**Fig.S2** Plot of the pseudo-first order kinetic model for Cr (VI) on different materials.

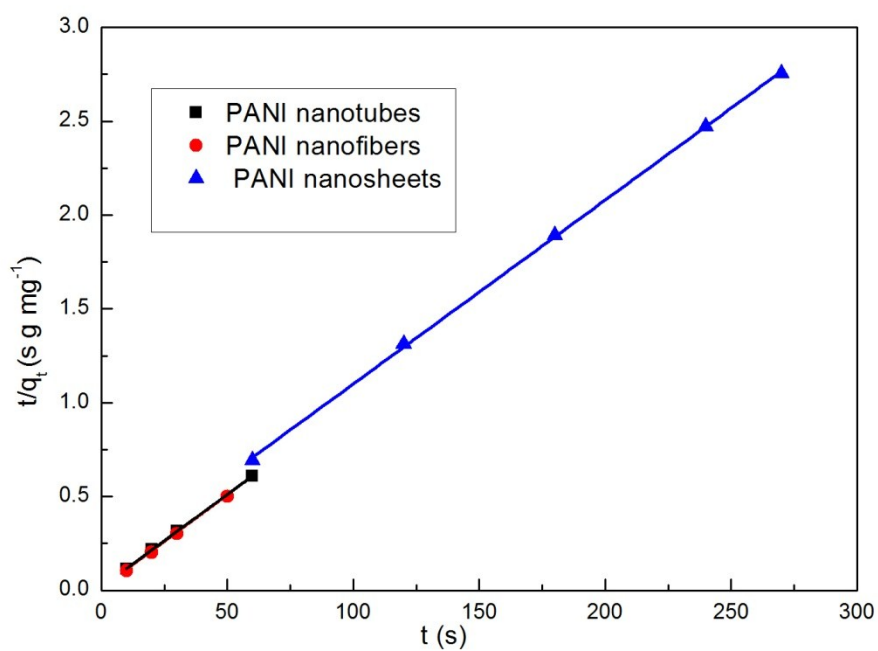

**Fig.S3** Plot of the pseudo-second order kinetic model for Cr (VI) on different materials.

## 5. Adsorption isotherms.

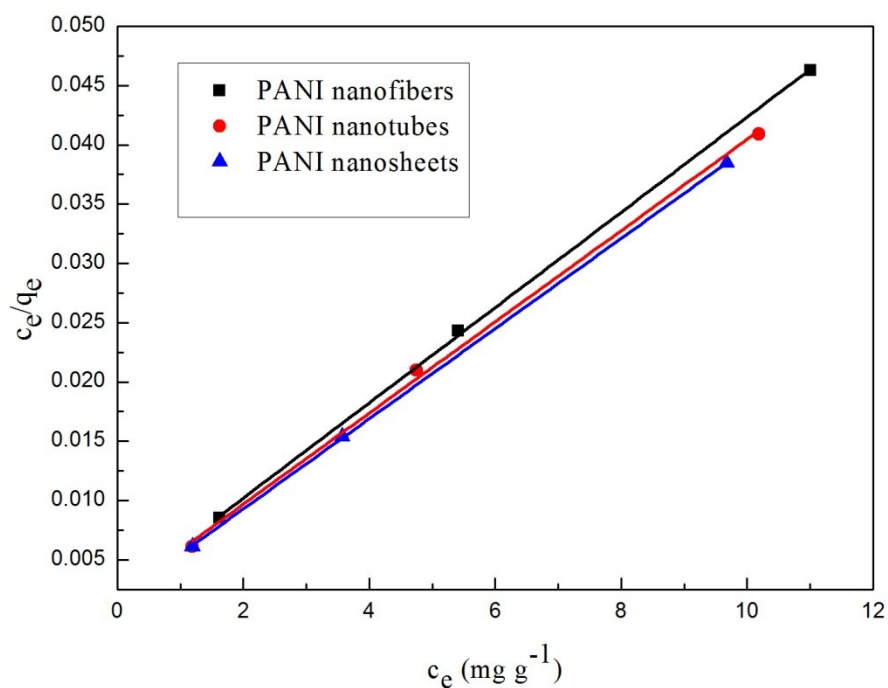

**Fig.S4** Langmuir isotherms for Cr (VI) ion adsorption on three different morphologies of PANIs nanostructures

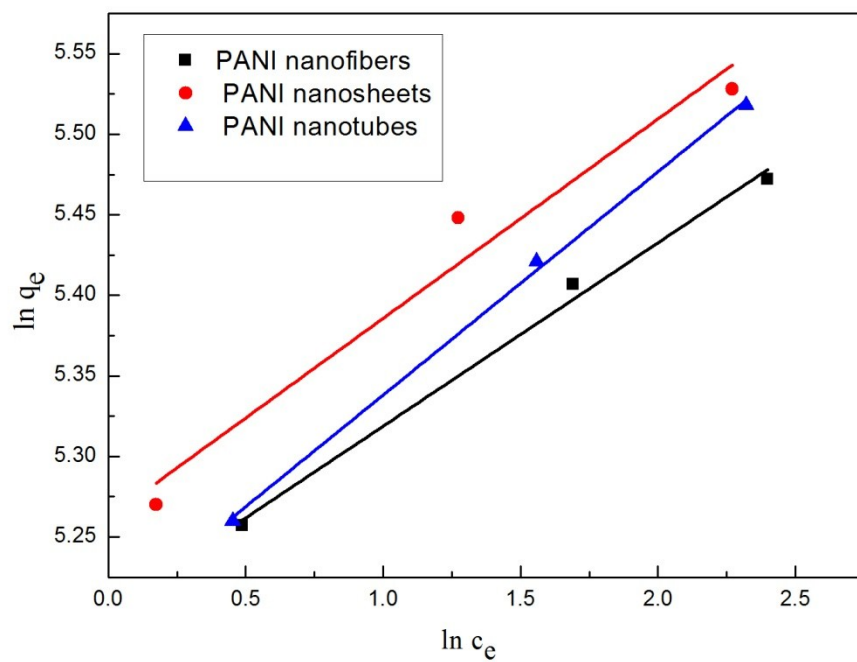

**Fig.S5** Freundlich isotherms for Cr (VI) ion adsorption on three different morphologies of PANIs nanostructures
